# Supplementary material
Source: Springer Nature journal article supplement (https://www.springermedizin.de/resource/supplementary/12884_2010_322_MOESM1_ESM.pdf/9457456)

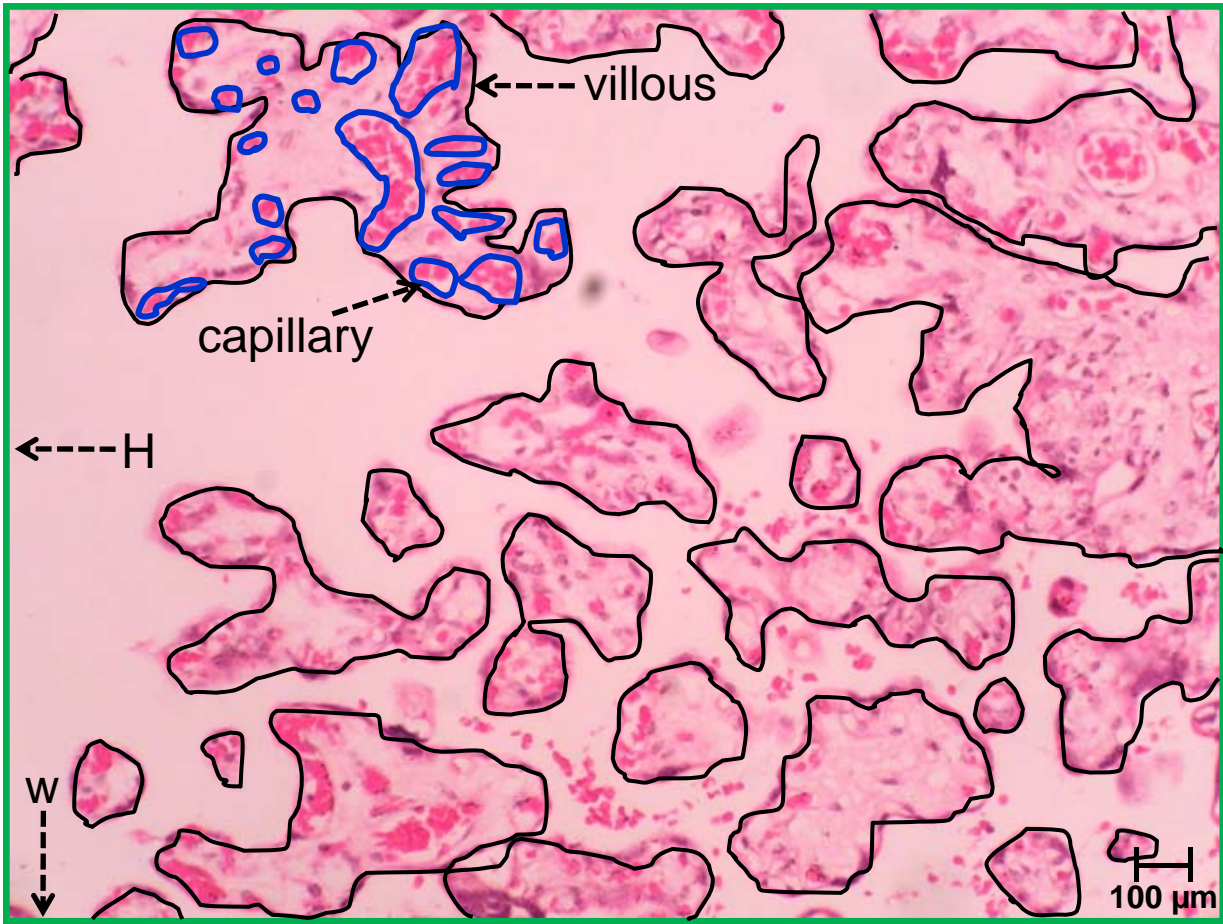

←--- villous

capillary ←---

←--- H

W  
↓---

100 μm

Supplement: MOESM1 [file 9457456]
